# Supplementary material
Source: PubMed Central journal article supplement (PMC1253826)
Supplement: pnas_0409904102_1.pdf [file pnas_0409904102_1.pdf]

A

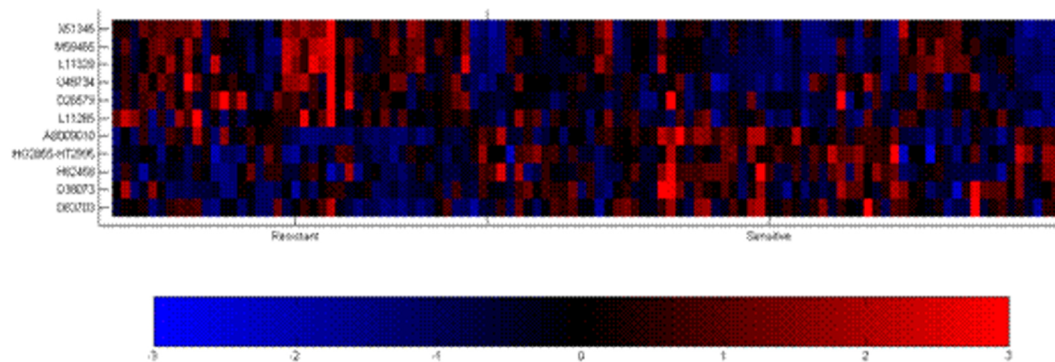

B

| Baseline      |            |            |            |            |                               |
|---------------|------------|------------|------------|------------|-------------------------------|
| GenBank       | Mean       | StdDev     | Mean       | StdDev     | Gene Description              |
|               | Resi start |            | Sensitive  |            |                               |
| X51345        | 1.2809063  | 0.47821143 | 0.90757054 | 0.44340643 | jun-B gene product (AA 1-347) |
| M59465        | 1.3310599  | 0.70167446 | 0.85038185 | 0.532715   | TNF alpha inducible protein   |
| L11329        | 1.6090386  | 0.9719437  | 0.983158   | 0.7109755  | PAC-1; putative               |
| U48734        | 1.1262349  | 0.2725686  | 0.9496291  | 0.23092356 | Non-muscle alpha-actinin      |
| D26579        | 1.2162056  | 0.33925694 | 1.006335   | 0.25838536 | CD156; ADAM8; MS2             |
| L11285        | 1.115763   | 0.26288566 | 0.95236343 | 0.20749286 | Chr 8 clone RP11-79H23.       |
| AB009010      | 0.7916807  | 0.40225455 | 1.1170315  | 0.46532506 | mRNA for polyubiquitin Ub C.. |
| HG2855-HT2995 | 0.88986063 | 0.21247359 | 1.0750406  | 0.28242376 | No information                |
| H82469        | 0.9372186  | 0.2746462  | 1.1584291  | 0.3517582  | Melanocyte 2NbHM.             |
| D38073        | 0.9192452  | 0.25125307 | 1.1293775  | 0.343006   | MCM3 homolog                  |
| D83703        | 0.91450083 | 0.31070682 | 1.145543   | 0.3498073  | Peroxisome assembly factor-2  |
