# Supplementary material
Source: PubMed Central journal article supplement (PMC1253826)
Supplement: pnas_0409904102_2.pdf [file pnas_0409904102_2.pdf]

**Table 2. FEV1 values (% predicted) before and after bronchodilator therapy and before and after a course of oral GC therapy in GC-S vs. GC-R asthma patients**

| Therapy  | GC-S ( <i>n</i> = 64) |           | GC-R ( <i>n</i> = 42) |           |
|----------|-----------------------|-----------|-----------------------|-----------|
|          | FEV1 pre              | FEV1 post | FEV1 pre              | FEV1 post |
| SAB2AR*  | 83 ± 14               | 88 ± 16   | 74 ± 14               | 83 ± 15   |
| Oral GC† | 77 ± 13               | 86 ± 14   | 75 ± 13               | 77 ± 14   |

\* Two puffs of albuterol.

† A 5- to 14-day course of oral GC (1 mg/kg).
