# Supplementary material
Source: PubMed Central journal article supplement (PMC1253826)
Supplement: pnas_0409904102_3.pdf [file pnas_0409904102_3.pdf]

**Table 3. FACS results showing % positive PBMC**

| <b>Phenotype</b>   | <b>monoclonal antibodies</b> |                 |                 |                  |                  |
|--------------------|------------------------------|-----------------|-----------------|------------------|------------------|
|                    | <b>CD-3 pos</b>              | <b>CD-4 pos</b> | <b>CD-8 pos</b> | <b>CD-19 pos</b> | <b>CD-14 pos</b> |
| <b>GCsensitive</b> | 85 ± 12                      | 53 ± 11         | 27 ± 4          | 3 ± 2            | 6 ± 3            |
| <b>GCresistant</b> | 84 ± 14                      | 58 ± 12         | 24 ± 11         | 3 ± 4            | 5 ± 3            |
| <b>Control</b>     | 81 ± 8                       | 50 ± 11         | 28 ± 4          | 4 ± 2            | 6 ± 2            |

Distribution of T cells, B cells, and monocytes in the PBMC pellet isolated from GC-S ( $n = 40$ ) and GC-R ( $n = 22$ ) asthma patients and nonasthmatic (control) subjects ( $n = 10$ ).
