# Supplementary material
Source: PubMed Central journal article supplement (PMC1253826)
Supplement: pnas_0409904102_4.pdf [file pnas_0409904102_4.pdf]

**Table 4. Confusion matrix for the LOOCV data (RT-PCR)**

| Baseline condition (Nfkb)                                                 | One Gene                          |      |    |
|---------------------------------------------------------------------------|-----------------------------------|------|----|
|                                                                           | Predicted Phenotype               |      |    |
| True phenotype                                                            | R                                 | S    |    |
| Glucocorticoid Resistant (R)                                              | 37                                | 2    | 39 |
| Glucocorticoid Sensitive (S)                                              | 11                                | 29   | 40 |
| Accuracy 81.25%                                                           | 48                                | 31   | 79 |
| Cpro=                                                                     | $(39/79)*(39/79)+(40/79)*(40/79)$ |      |    |
| Cpro=                                                                     | 0.500080115                       |      |    |
| Pcc=                                                                      | 66/79=                            | 0.84 |    |
| $(Pcc - Cpro)/\text{Sqrt}(Cpro(1-Cpro)/n) = 5.96124179$ (P = 1.1479e-009) |                                   |      |    |

The confusion matrix for the LOOCV for the prediction of GC sensitivity in 79 patients by using TaqMan RT-PCR data for the NFKB gene.
